# Supplementary material for: Sulfur monoxide dimer chemistry as a possible source of polysulfur in the upper atmosphere of Venus
Source: Springer Nature journal article supplement (doi:10.1038/s41467-020-20451-2), 2021-01-08
Supplement: MOESM1 [file 41467_2020_20451_MOESM1_ESM.pdf]

# **Supplementary Information: Sulfur monoxide dimer chemistry as a possible source of polysulfur in the upper atmosphere of Venus**

**Joseph P. Pinto<sup>1</sup>, Jiazheng Li<sup>2</sup>, Franklin P. Mills<sup>3,4</sup>, Emmanuel Marcq<sup>5</sup>, Daria Evdokimova<sup>5,6</sup>, Denis Belyaev<sup>6</sup> and Yuk L. Yung<sup>2,7</sup>**

<sup>1</sup>University of North Carolina at Chapel Hill, NC, USA

<sup>2</sup>Division of Geological and Planetary Science, California Institute of Technology, Pasadena, CA, USA

<sup>3</sup>Australian National University, Canberra, ACT, Australia

<sup>4</sup>Space Science Institute, Boulder, CO, USA

<sup>5</sup>LATMOS/CNRS/Sorbonne Université/UVSQ, France

<sup>6</sup>Space Research Institute of the Russian Academy of Sciences (IKI), Moscow, Russia

<sup>7</sup>Jet Propulsion Laboratory, California Institute of Technology, Pasadena, CA, USA

Corresponding author: Jiazheng Li (jiazheng@caltech.edu)

**Supplementary Table 1.** Reactions involving the SO dimer in the photochemical model.

| Reactions                                                                             | Photolysis Rate, J<br>Rate Coefficients, k*      | References |
|---------------------------------------------------------------------------------------|--------------------------------------------------|------------|
| 1. $\text{SO} + \text{SO} + \text{M} \rightarrow \text{c}-(\text{SO})_2 + \text{M}$   | $k = 2.15 \times 10^{-31}; 1.00 \times 10^{-11}$ | a          |
| 2. $\text{SO} + \text{SO} + \text{M} \rightarrow \text{t}-(\text{SO})_2 + \text{M}$   | $k = 2.15 \times 10^{-31}; 1.00 \times 10^{-11}$ | a          |
| 3. $\text{SO} + \text{SO} + \text{M} \rightarrow \text{r}-(\text{SO})_2 + \text{M}$   | $k = 8.80 \times 10^{-33}; 1.00 \times 10^{-11}$ | a          |
| 4. $\text{c}-(\text{SO})_2 + h\nu \rightarrow \text{SO} + \text{SO}$                  | $J = 9.30 \times 10^{-2}$                        | a          |
| 5. $\text{c}-(\text{SO})_2 + h\nu \rightarrow \text{S}_2 + \text{O}_2$                | $J = 9.30 \times 10^{-3}$                        | a          |
| 6. $\text{t}-(\text{SO})_2 + h\nu \rightarrow \text{SO} + \text{SO}$                  | $J = 9.30 \times 10^{-2}$                        | a          |
| 7. $\text{r}-(\text{SO})_2 + h\nu \rightarrow \text{S} + \text{SO}_2$                 | $J = 1.20 \times 10^{-1}$                        | a          |
| 8. $\text{O} + \text{c}-(\text{SO})_2 \rightarrow \text{S}_2\text{O} + \text{O}_2$    | $k = 3.00 \times 10^{-14}$                       | a          |
| 9. $\text{O} + \text{c}-(\text{SO})_2 \rightarrow \text{SO} + \text{SO}_2$            | $k = 3.00 \times 10^{-15}$                       | a          |
| 10. $\text{O} + \text{t}-(\text{SO})_2 \rightarrow \text{S}_2\text{O} + \text{O}_2$   | $k = 3.00 \times 10^{-14}$                       | a          |
| 11. $\text{O} + \text{t}-(\text{SO})_2 \rightarrow \text{SO} + \text{SO}_2$           | $k = 3.00 \times 10^{-15}$                       | a          |
| 12. $\text{H} + \text{c}-(\text{SO})_2 \rightarrow \text{S}_2\text{O} + \text{OH}$    | $k = 3.00 \times 10^{-14}$                       | b          |
| 13. $\text{H} + \text{t}-(\text{SO})_2 \rightarrow \text{S}_2\text{O} + \text{OH}$    | $k = 3.00 \times 10^{-14}$                       | b          |
| 14. $\text{NO} + \text{c}-(\text{SO})_2 \rightarrow \text{S}_2\text{O} + \text{NO}_2$ | $k = 3.00 \times 10^{-14}$                       | b          |
| 15. $\text{NO} + \text{t}-(\text{SO})_2 \rightarrow \text{S}_2\text{O} + \text{NO}_2$ | $k = 3.00 \times 10^{-14}$                       | b          |
| 16. $\text{SO} + \text{c}-(\text{SO})_2 \rightarrow \text{S}_2\text{O} + \text{SO}_2$ | $k = 3.00 \times 10^{-14}$                       | b          |
| 17. $\text{SO} + \text{t}-(\text{SO})_2 \rightarrow \text{S}_2\text{O} + \text{SO}_2$ | $k = 3.00 \times 10^{-14}$                       | a          |
| 18. $\text{S} + \text{c}-(\text{SO})_2 \rightarrow \text{S}_2\text{O} + \text{SO}$    | $k = 3.00 \times 10^{-14}$                       | a          |
| 19. $\text{S} + \text{t}-(\text{SO})_2 \rightarrow \text{S}_2\text{O} + \text{SO}$    | $k = 3.00 \times 10^{-14}$                       | a          |
| 20. $\text{S}_2 + \text{c}-(\text{SO})_2 \rightarrow 2\text{S}_2\text{O}$             | $k = 3.00 \times 10^{-14}$                       | a          |
| 21. $\text{S}_2 + \text{t}-(\text{SO})_2 \rightarrow 2\text{S}_2\text{O}$             | $k = 3.00 \times 10^{-14}$                       | a          |

\*Low and high pressure rate coefficients given for SO dimer formation; J values given at 112 km, units are  $\text{cm}^{-3}\text{s}^{-1}$  for J and  $\text{cm}^3\text{s}^{-1}\text{molec}^{-1}$ ,  $\text{cm}^6\text{s}^{-1}\text{molec}^{-2}$  for k. References: (a) ref. 1 and references therein; (b) estimated based on ref. 1.

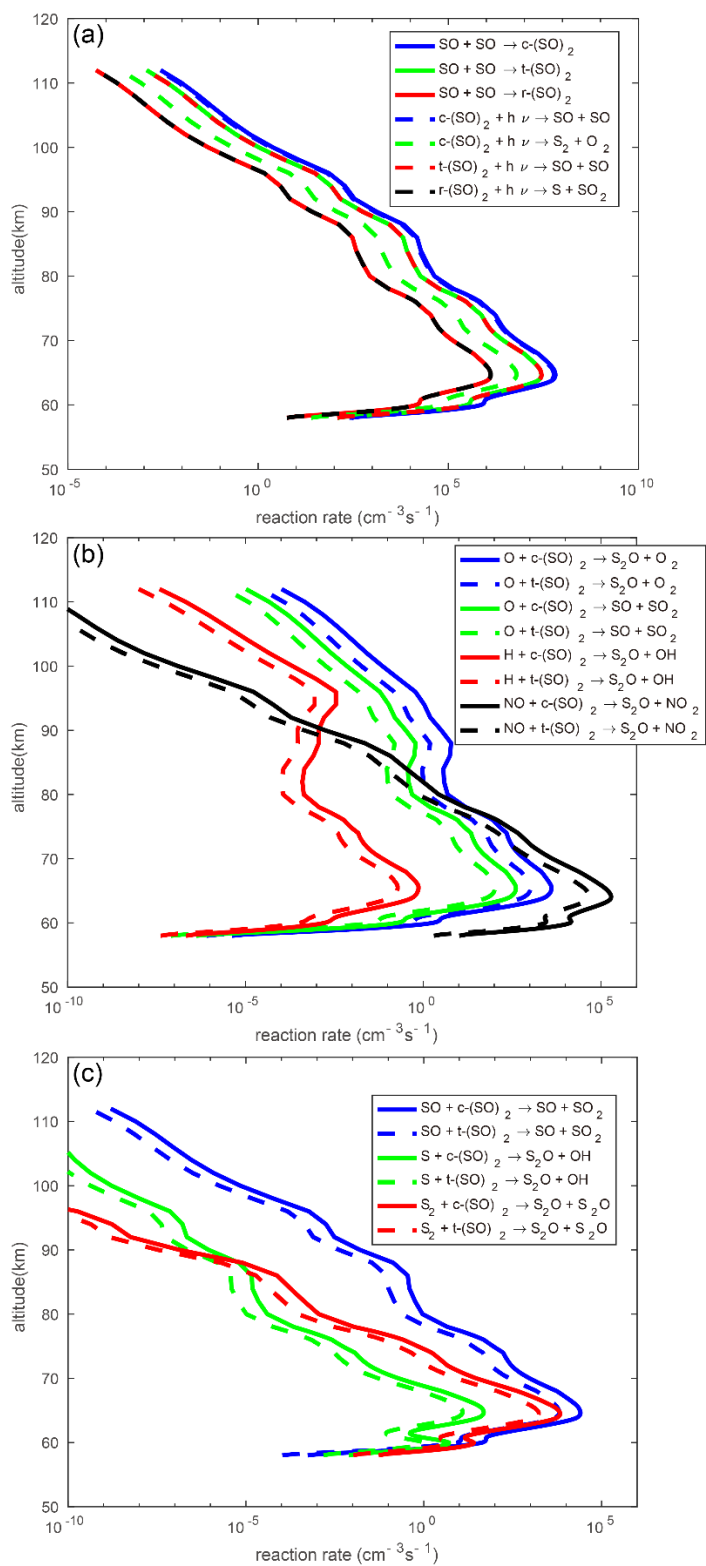

**Supplementary Figure 1.** Reaction rate profiles of the reactions in Table S1.

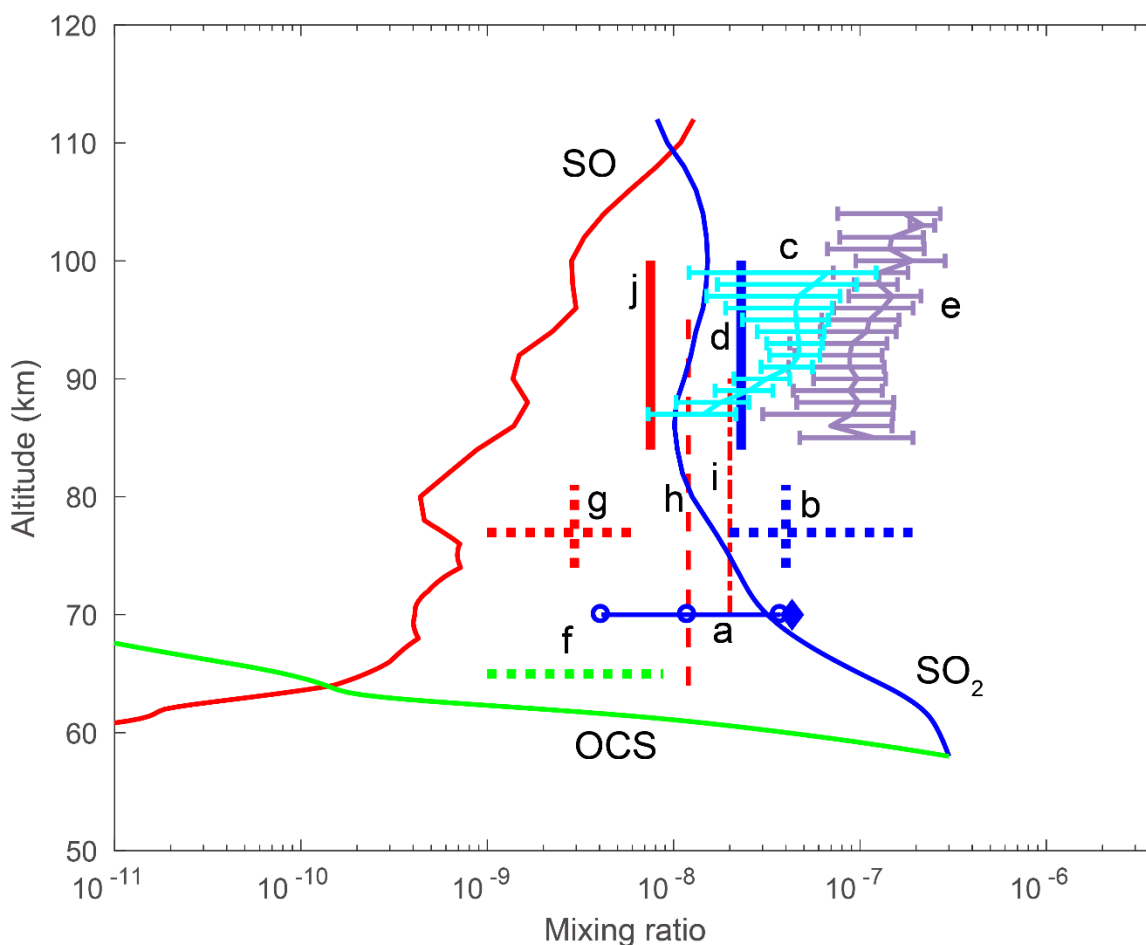

**Supplementary Figure 2.** Comparison of modeled profiles of  $\text{SO}_2$ , OCS and SO with observations for  $\text{SO}_2 = 0.3$  ppm and OCS = 0.3 ppm at 58 km, the lower boundary of the model. Model profiles are shown as thin solid lines; (blue)  $\text{SO}_2$ , (green) OCS, (red) SO. Model  $\text{SO}_2$  and SO profiles considering new  $\text{H}_2\text{SO}_4$  cross sections from ref. 2 are shown as thin dotted lines. Model OCS profile using 100 ppm at 58 km shown as dotted line. Data sources: (a)  $\text{SO}_2$ , interquartile range from 2010 through 2014, diamond shows mean of distribution, ref. 3; (b)  $\text{SO}_2$ , ref. 4; (c)  $\text{SO}_2$ , ref. 5 solar occultation with 1- $\sigma$  error bars; (d)  $\text{SO}_2$ , ref. 6; (e)  $\text{SO}_2$ , ref. 5 stellar occultation with 1- $\sigma$  error bars; (f) OCS, ref. 7; (g) SO, ref. 4; (h) SO, ref. 8; (i) SO, ref. 9; (j) SO, ref. 6.

## References

1. Zhang, X., Liang, M. C., Mills, F. P. et al (2012). Sulfur chemistry in the middle atmosphere of Venus. *Icarus*, 217, 714-739.
2. Farahani, S., Frandsen, B. N., Kjaergaard, H. G., et al. (2019). Simulated Electronic Absorption Spectra of Sulfur-Containing Molecules Present in Earth's Atmosphere. *The Journal of Physical Chemistry A*, 123, 6605-6617.
3. Marcq, E., Jessup, K. L., Baggio, L. et al. (2020). Climatology of SO<sub>2</sub> and UV absorber at Venus' cloud top from SPICAV-UV nadir dataset. *Icarus*, 335, 113368.
4. Jessup, K. L., Marcq, E., Mills, F. et al. (2015). Coordinated Hubble Space Telescope and Venus Express observations of Venus' upper cloud deck. *Icarus*, 258, 309-336.
5. Belyaev, D. A., Evdokimova, D. G., Montmessin, F., et al. (2017). Night side distribution of SO<sub>2</sub> content in Venus' upper mesosphere. *Icarus*, 294, 58-71.
6. Sandor, B. J., Clancy, R. T., Moriarty-Schieven, G., et al. (2010). Sulfur chemistry in the Venus mesosphere from SO<sub>2</sub> and SO microwave spectra. *Icarus*, 208, 49-60.
7. Krasnopolsky, V. A. (2010). Spatially-resolved high-resolution spectroscopy of Venus 2. Variations of HDO, OCS, and SO<sub>2</sub> at the cloud tops. *Icarus*, 209, 314-322.
8. Na, C. Y., Esposito, L. W., McClintock, W. E. et al. (1994). Sulfur dioxide in the atmosphere of Venus: II. Modeling results. *Icarus*, 112, 389-395.
9. Na, C. Y., Esposito, L. W., & Skinner, T. E. (1990). International ultraviolet explorer observation of Venus SO<sub>2</sub> and SO. *Journal of Geophysical Research: Atmospheres*, 95, 7485-7491.
